# Supplementary material for: Benzodiazepines Reduce Relapse and Recurrence Rates in Patients with Psychotic Depression
Source: MDPI journal article supplement (doi:10.3390/jcm9061938), 2020-06-21
Supplement: s1 [file s1]

**Supplemental Table S1.** *p*-Values for table 1.

| Characteristic            | Overall patients with MDD (N=108)  |                                            | Patients with MDD with psychotic features (N=26) |                                            |
|---------------------------|------------------------------------|--------------------------------------------|--------------------------------------------------|--------------------------------------------|
|                           | BZD                                | NO-BZD                                     | BZD-P                                            | NO-BZD-P                                   |
|                           | (N=83: patients who received BZDs) | (N=25: patients who did not received BZDs) | (n=14: patients who received BZDs)               | (n=12: patients who did not received BZDs) |
|                           | <i>P</i> value                     |                                            | <i>P</i> value                                   |                                            |
| Female sex                | >0.999                             |                                            | >0.999                                           |                                            |
| antidepressants           |                                    |                                            |                                                  |                                            |
| SSRIs                     | 0.820                              |                                            | 0.431                                            |                                            |
| SNRIs                     | 0.274                              |                                            | 0.401                                            |                                            |
| mirtazapine               | 0.244                              |                                            | 0.248                                            |                                            |
| antipsychotics            | >0.999                             |                                            | >0.999                                           |                                            |
| olanzapine                | 0.714                              |                                            | >0.999                                           |                                            |
| quetiapine                | 0.601                              |                                            | >0.999                                           |                                            |
| mECT                      | * 0.0053                           |                                            | >0.999                                           |                                            |
| Diagnosis                 |                                    |                                            |                                                  |                                            |
| 296.2x                    | >0.999                             |                                            |                                                  |                                            |
| 296.21/296.22             | 0.149                              |                                            |                                                  |                                            |
| 296.23                    | >0.999                             |                                            |                                                  |                                            |
| 296.24                    | * 0.0096                           |                                            | 0.422                                            |                                            |
| 296.3x                    | >0.999                             |                                            |                                                  |                                            |
| 296.31/296.32             | 0.983                              |                                            |                                                  |                                            |
| 296.33                    | 0.173                              |                                            |                                                  |                                            |
| 296.34                    | 0.196                              |                                            | 0.422                                            |                                            |
| age                       | 0.0502                             |                                            | 0.675                                            |                                            |
| Period from onset         | 0.258                              |                                            | 0.313                                            |                                            |
| HAM-D                     | 0.0274                             |                                            | 0.712                                            |                                            |
| Length of hospitalization | 0.594                              |                                            | 0.989                                            |                                            |

MDD, major depressive disorder; BZDs, benzodiazepines; SSRI, selective serotonin reuptake inhibitor; SNRI, serotonin and norepinephrine reuptake inhibitor; mECT, modified electroconvulsive therapy; SD, standard deviation; IQR, interquartile range. Patient characteristics were compared between those with and without benzodiazepines using Mann-Whitney U test and Fisher's exact test.  
\*  $P < 0.01$ .

**Supplemental Table S2.** Details of benzodiazepines analyzed in this study and their half life and drug strength. Drug strength was obtained from the table of dose equivalence of benzodiazepines in a previous report [14].

|              | Half life (h) | Drug strength |
|--------------|---------------|---------------|
| alprazolam   | 14            | 0.8           |
| brotizolam   | 7             | 0.25          |
| zolpidem     | 1.78          | 10            |
| nitrazepam   | 25.1          | 5             |
| clonazepam   | 27            | 0.25          |
| quazepam     | 36.6          | 15            |
| lorazepam    | 12            | 1.2           |
| lormetazepam | 10            | 1             |
| clotiazepam  | 6.3           | 10            |

|               |      |      |
|---------------|------|------|
| flunitrazepam | 7    | 1    |
| loflazepate   | 122  | 1.67 |
| zopiclone     | 3.9  | 7.5  |
| etizolam      | 6    | 1.5  |
| estazolam     | 24   | 2    |
| diazepam      | 27   | 5    |
| triazolam     | 2.9  | 0.25 |
| rilmazafone   | 10.5 | 2    |
| bromazepam    | 8    | 2.5  |
| eszopiclone   | 5    | 2.5  |

**Supplemental Table S3.** Details of antidepressants and antipsychotics.

| Characteristic            | Patients with MDD with<br>psychotic features (N=26) |                                               |
|---------------------------|-----------------------------------------------------|-----------------------------------------------|
|                           | BZD-P                                               | NO-BZD-P                                      |
|                           | (n=14: patients who<br>received BZDs)               | (n=12: patients who did<br>not received BZDs) |
|                           | N (%)                                               | N (%)                                         |
| antidepressants           |                                                     |                                               |
| SSRIs                     | 9 (64.3%)                                           | 5 (41.7%)                                     |
| sertraline(100mg)         | 3                                                   | 2                                             |
| escitalopram<br>(20mg)    | 2                                                   | 3                                             |
| paroxetine (50mg)         | 2                                                   | 0                                             |
| SNRIs                     | 3 (21.4%)                                           | 5 (41.7%)                                     |
| duloxetine (60mg)         | 2                                                   | 4                                             |
| venlafaxine<br>(225mg)    | 1                                                   | 0                                             |
| mirtazapine               | 7 (50.0%)                                           | 3 (25.0%)                                     |
| mirtazapine (45mg)        | 3                                                   | 3                                             |
| mirtazapine (30mg)        | 4                                                   | 0                                             |
| antipsychotics            | 7 (50.0%)                                           | 6 (50.0%)                                     |
| olanzapine                | 2 (14.3%)                                           | 2 (16.7%)                                     |
| olanzapine (2.5mg)        | 1                                                   | 0                                             |
| olanzapine (5mg)          | 1                                                   | 2                                             |
| quetiapine                | 4 (28.6%)                                           | 4 (33.3%)                                     |
| quetiapine (25 mg)        | 1                                                   | 0                                             |
| quetiapine (75-100<br>mg) | 2                                                   | 4                                             |
| quetiapine (200 mg)       | 1                                                   | 0                                             |
